# Supplementary material
Source: PubMed Central journal article supplement (PMC3172051)
Supplement: NIHMS321534-supplement-Supplementary_figure_1.pdf [file NIHMS321534-supplement-Supplementary_figure_1.pdf]

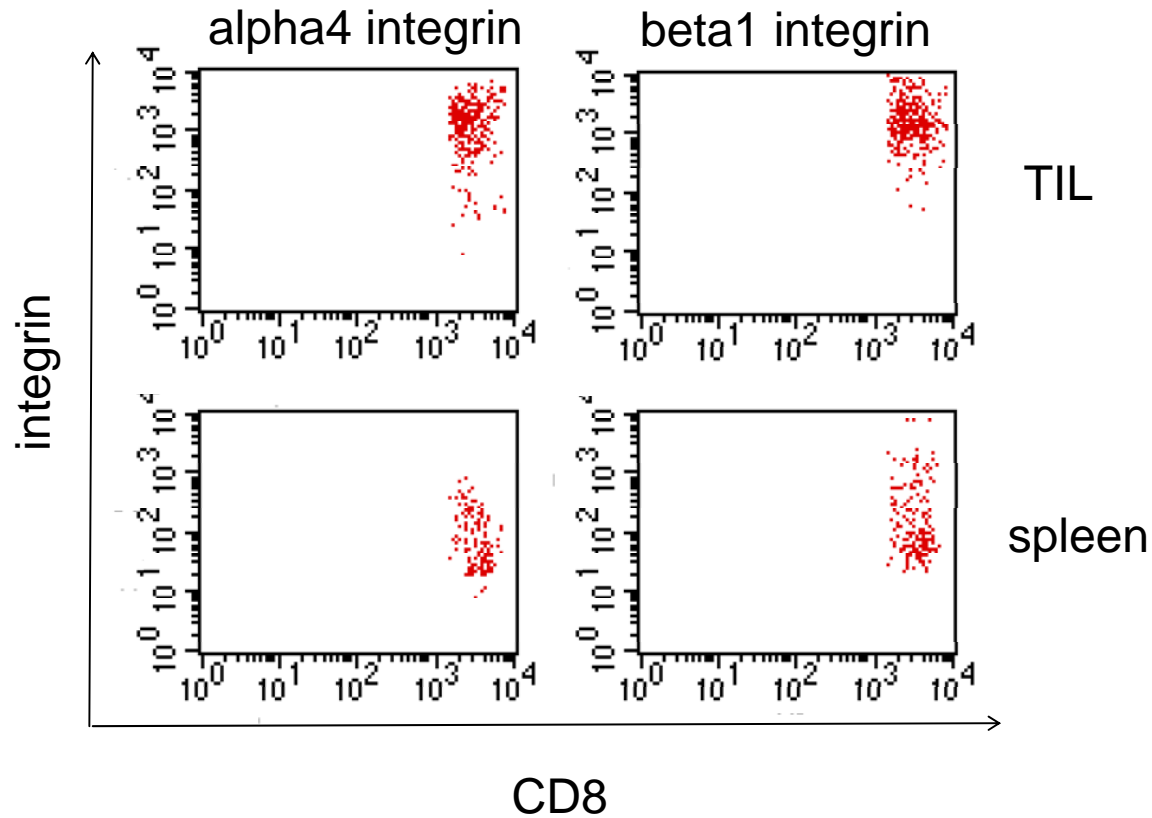

**Supplementary Figure 1. Tumor-infiltrating CD8<sup>+</sup> T cells express high level of  $\alpha_4\beta_1$  integrin (VLA-4).** C57BL/6 mice (5 per group) were challenged with  $1 \times 10^5$ /mouse of P0 tumor cells. Two weeks later, splenocytes and tumor infiltrating lymphocytes were isolated and the expression of  $\alpha_4\beta_1$  integrin (VLA-4) on splenocytes and tumor-infiltrating CD8<sup>+</sup> T cells was characterized using flow cytometry analysis with antibodies against  $\alpha_4$  and  $\beta_1$  integrin molecules.
