# Supplementary material
Source: PubMed Central journal article supplement (PMC3172051)
Supplement: NIHMS321534-supplement-Supplementary_figure_2.pdf [file NIHMS321534-supplement-Supplementary_figure_2.pdf]

**A**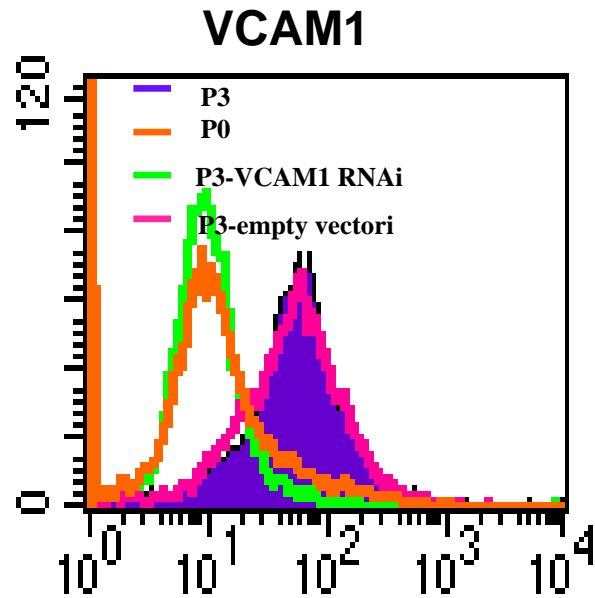**B**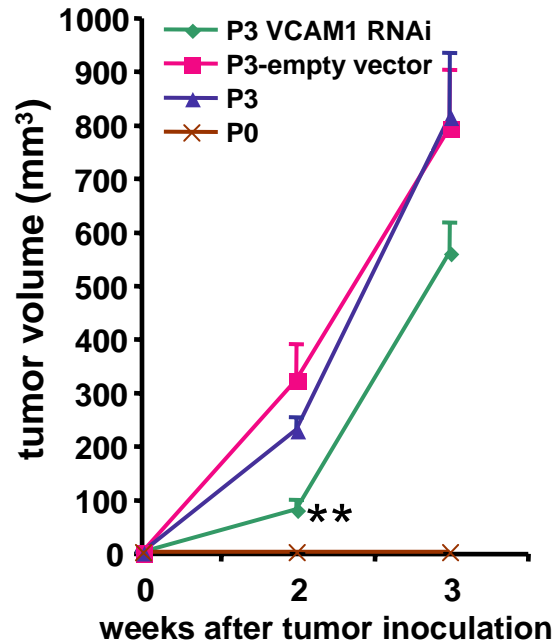

**Supplementary Figure 2. Downregulation of VCAM1 in P3 tumor cells leads to reduced tumor immune evasion.** (A) Flow cytometry analysis to characterize the expression of VCAM1 in the P3 tumors transduced with lentivirus encoding siRNA targeting VCAM1 or empty vector using VCAM1-specific antibody. (B) *In vivo* tumor growth experiment to compare the kinetics of tumor growth of the various tumors over time. C57BL/6 mice (5 per group) were vaccinated with  $1 \times 10^7$  pfu/mouse of Sig/E7/LAMP-1 vaccinia. One week later, the mice were challenged with  $1 \times 10^5$  /mouse of P0, P3, P3-VCAM1 RNAi and the P3-empty vector tumor cells subcutaneously. \*\* indicates statistical significance of tumor volume in P3VCAM1 RNAi group compared to P3-empty vector group ( $p < 0.05$ ).
