# Supplementary material
Source: PubMed Central journal article supplement (PMC3172051)
Supplement: NIHMS321534-supplement-Supplementary_figure_3.pdf [file NIHMS321534-supplement-Supplementary_figure_3.pdf]

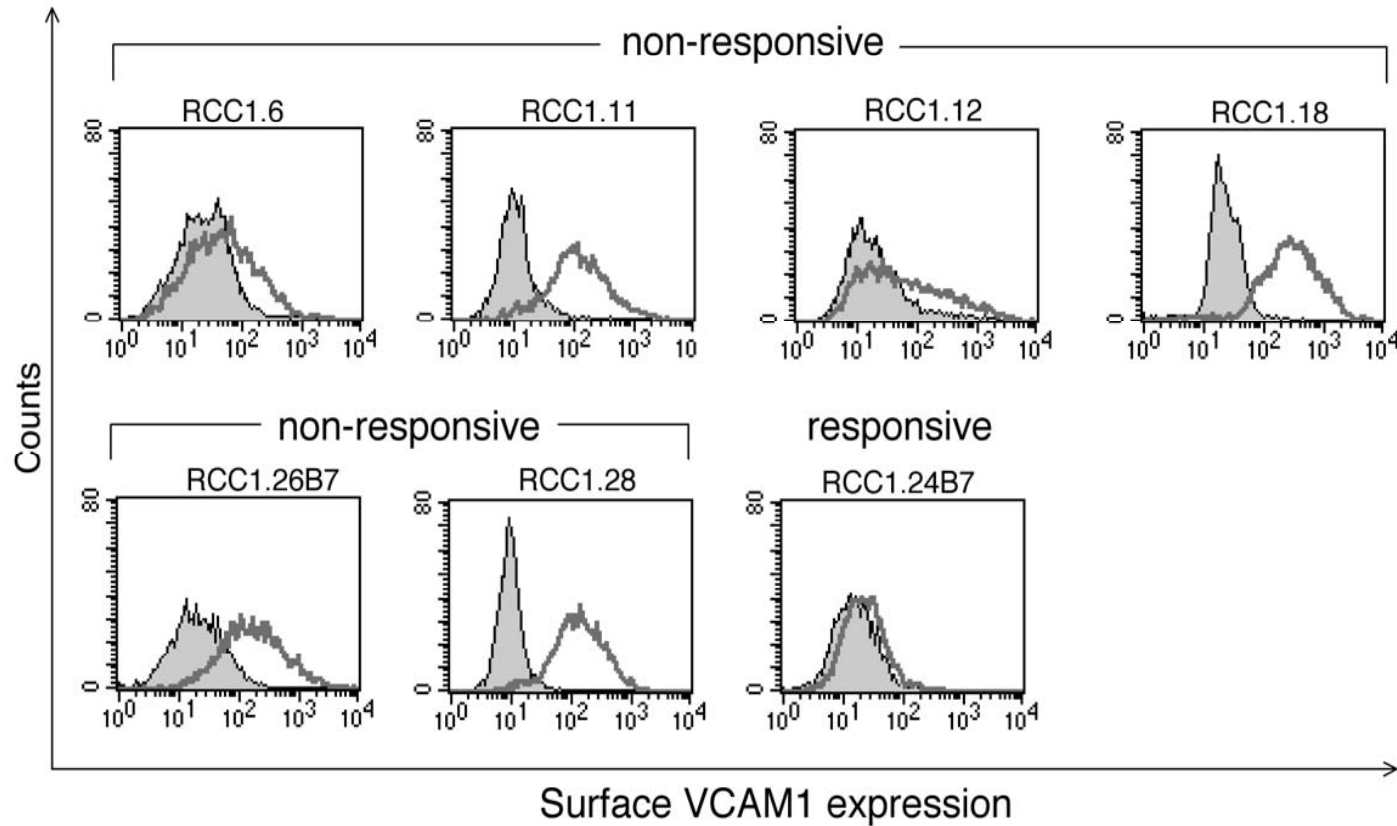

**Supplementary Figure 3. VCAM-1 is over-expressed in most human renal cell carcinoma cell (RCC) lines.** Expression level of VCAM-1 on several RCC cell lines was assayed using flow cytometry analysis. The gray area represents staining with an isotype control antibody.
